# Supplementary material
Source: MDPI journal article supplement (https://www.mdpi.com/2073-4395/11/6/1124)
Supplement: s1 [file s1]

**Table S1.** Genes involved in plant colonization and plant growth promotion found in the genomes of *Phyllobacterium endophyticum* PEPV15 and *Rhizobium laguerreae* PEPV16

| Gene name                                       | Encoded functions (or proteins)                         | Accession in the genome of strain PEPV15 (GenBank) | Accession in the genome of strain PEPV16 (GenBank) |
|-------------------------------------------------|---------------------------------------------------------|----------------------------------------------------|----------------------------------------------------|
| <b>PGAP(RAST)</b>                               |                                                         |                                                    |                                                    |
| <b>Genes involved in plant colonization</b>     |                                                         |                                                    |                                                    |
| <i>Bcs</i>                                      | cellulose biosynthesis                                  | VSZT01000008.1                                     | VSZV01000278.1                                     |
| <i>ExoD</i>                                     | exopolysaccharide biosynthesis                          |                                                    | VSZV01000310.1                                     |
| <i>ExoM, ExoO</i>                               | succinoglycan biosynthesis                              | JACHXT010000002.1                                  |                                                    |
| <i>ExoQ</i>                                     | O-antigen ligase family protein                         | VSZT01000008.1                                     |                                                    |
| <i>ExoR</i>                                     | exopolysaccharide biosynthesis negative regulator       | PGGN01000002.1                                     |                                                    |
| Unnamed ( <i>PssV</i> )                         | exopolysaccharide biosynthesis                          |                                                    | VSZV01000314.1, VSZV01000355.1                     |
| Unnamed                                         | exopolysaccharide biosynthesis                          | VSZT01000014.1                                     |                                                    |
| <i>ExoF</i>                                     | exopolysaccharide biosynthesis                          | VSZT01000008.1                                     | VSZV01000337.1                                     |
| <i>Flg, Flh, Fli, Mot</i>                       | flagella biosynthesis                                   | VSZT01000008.1                                     | VSZV01000353.1, VSZV01000218.1                     |
| <i>FlaA</i>                                     | flagellins                                              | VSZT01000008.1                                     | VSZV01000353.1, VSZV01000356.1, VSZV01000326.1     |
| <i>MotC</i>                                     | chemotaxis                                              | VSZT01000008.1                                     | VSZV01000353.1                                     |
| <i>CheA</i>                                     | chemotaxis                                              |                                                    | VSZV01000353.1                                     |
| <i>CheD</i>                                     | chemotaxis                                              |                                                    | VSZV01000353.1                                     |
| <i>CheR</i>                                     | chemotaxis                                              | VSZT01000001.1                                     | VSZV01000310.1                                     |
| <i>CheW</i>                                     | chemotaxis                                              |                                                    | VSZV01000353.1                                     |
| Unnamed/ <i>LuxI</i>                            | N-acyl-L-homoserine lactone (AHL) synthase              |                                                    | VSZV01000338.1                                     |
| Unnamed                                         | GNAT family N-acetyltransferase                         | VSZT01000001.1                                     |                                                    |
| <b>Genes involved in plant growth promotion</b> |                                                         |                                                    |                                                    |
| <i>PqqB</i>                                     | pyrroloquinoline quinone biosynthesis                   | VSZT01000002.1                                     |                                                    |
| <i>PqqC</i>                                     | pyrroloquinoline-quinone synthase                       | VSZT01000002.1                                     |                                                    |
| <i>PqqD</i>                                     | pyrroloquinoline quinone biosynthesis peptide chaperone | VSZT01000002.1                                     |                                                    |
| <i>PqqE</i>                                     | pyrroloquinoline quinone biosynthesis                   | VSZT01000002.1                                     |                                                    |
| <i>NthA</i>                                     | nitrile hydratase subunit alpha                         | VSZT01000001.1                                     | VSZV01000298.1                                     |
| <i>NthB</i>                                     | nitrile hydratase subunit beta                          | VSZT01000001.1                                     | VSZV01000298.1                                     |
| Unnamed/ <i>LucB</i>                            | siderophore biosynthesis                                | PGGN01000001.1                                     | VSZV01000309.1                                     |
| <i>FixI</i>                                     | nitrogen fixation protein FixI                          | PGGN01000003.1                                     |                                                    |
| <i>FixJ</i>                                     | DNA-binding response regulator                          | PGGN01000003.1                                     |                                                    |
| <i>Nif*</i>                                     | Nitrogenases and cofactor biosynthesis proteins         |                                                    | VSZV01000266.1                                     |

\* These genes only are involved in symbiotic nitrogen fixation and then in the legume plant growth promotion.
